# Supplementary material
Source: PubMed Central journal article supplement (PMC2584702)
Supplement: 0807142105_0807142105SI.pdf [file 0807142105_0807142105SI.pdf]

# Supporting Information

Russell et al. 10.1073/pnas.0807142105

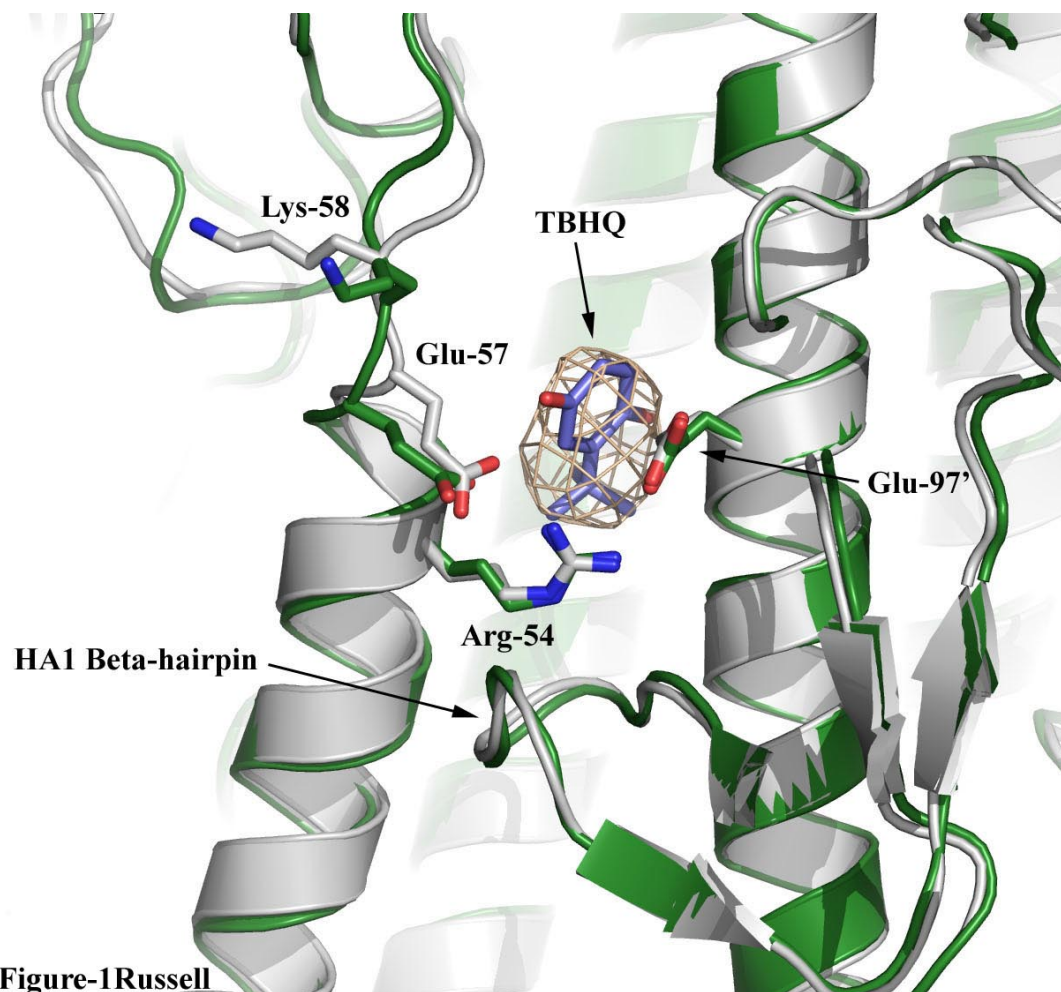

**Fig. S1.** Superposition of H14 HA-TBHQ complex (green) and X31 H3 HA (gray). The difference electron density map (contoured at  $3\sigma$ ) is shown for the X31 H3 HA. Selected residues are shown as sticks.
